# Supplementary material for: Legacy effects of climate extremes on deep soil water storage and water use efficiency across different land-use systems
Source: Research Square preprint supplement (doi:10.21203/rs.3.rs-7062058/v1), 2025-07-21

Supporting Information for: **Legacy effects of climate extremes on deep soil water storage and water use efficiency** **across different land-use systems**

By Mengqi Wu, et al.

Including:

- Figure S1-8 and Table S1-4

**Fig. S1** Water retention characteristics were measured with the evaporation method (Hyprop, METER Group) and the dew point hygrometer method (WP4C, METER Group). The volumetric water content at pF1.8 and pF4.2 represent the field capacity and permanent wilting point.


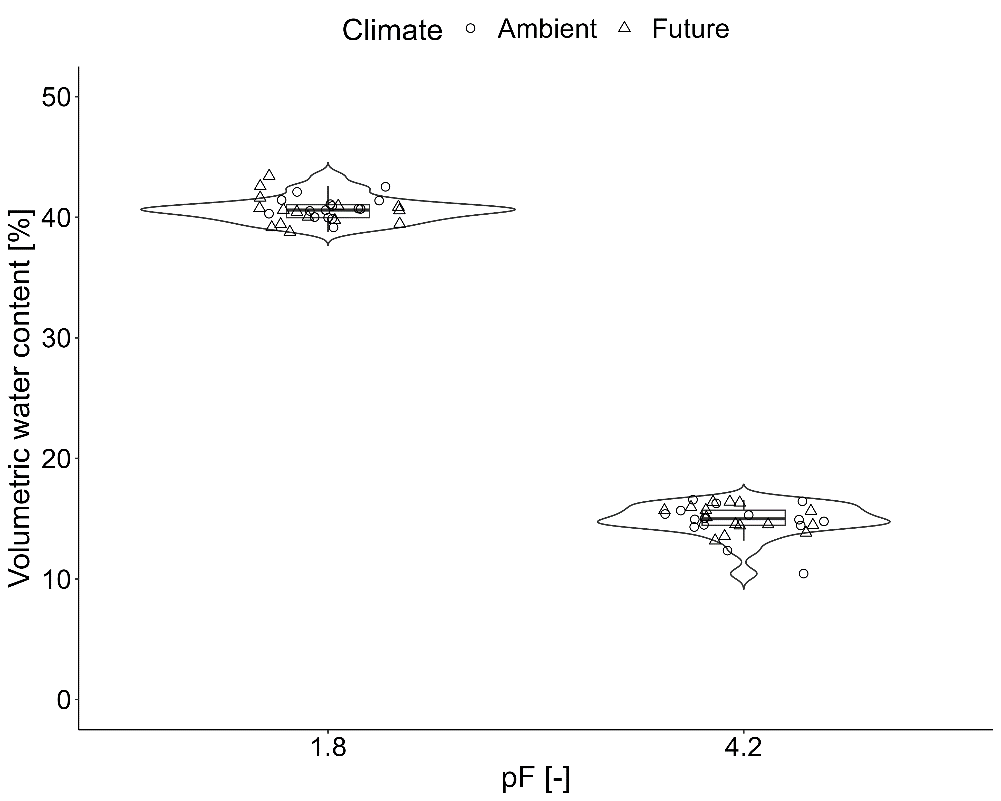


**Fig. S2** Violin plots showing relative proportion of fresh roots across five land use types and two years. Box plots represent the 0, 25, 50, 75, and 100 percentile and cross symbols the arithmetic mean (n = 10). CF, OF, IM, EM and EP represent conventional farming, organic farming, intensive meadow, extensive meadow and extensive pasture, respectively. Significant differences between land use, climate, year, interaction of land use and climate, land use and year are indicated * (*P* < 0.05), ** (*P* < 0.01), and *** (*P* < 0.001).


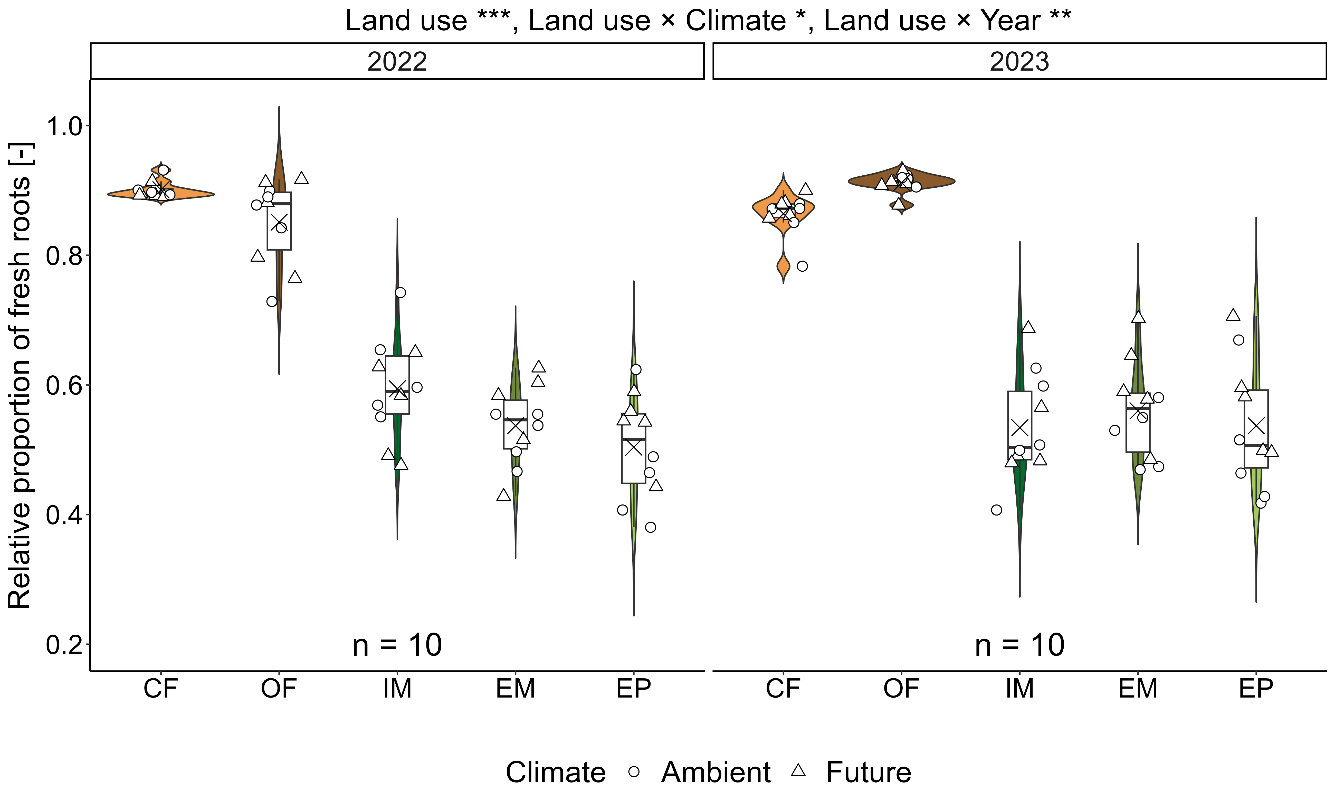


**Fig. S3** Initial structural equation model depicting how soil water storage and root length density affect water use efficiency and yield driven by land use, climate and climate extremes. Numbers next to arrows indicate standardized path coefficients (robust standard errors of coefficients). Lines indicate potential pathways. Lines with double sided arrow indicate potential relationship between covariances. Prior to scaling, the categorical levels of land use were ordered as CF, IM, OF, and EM to reflect the gradient of land-use intensity. All variables included in the model are continuous measures. The parameters of model are *Fisher’s C* = 20.145, *p* = 0.000, *df* = 4.


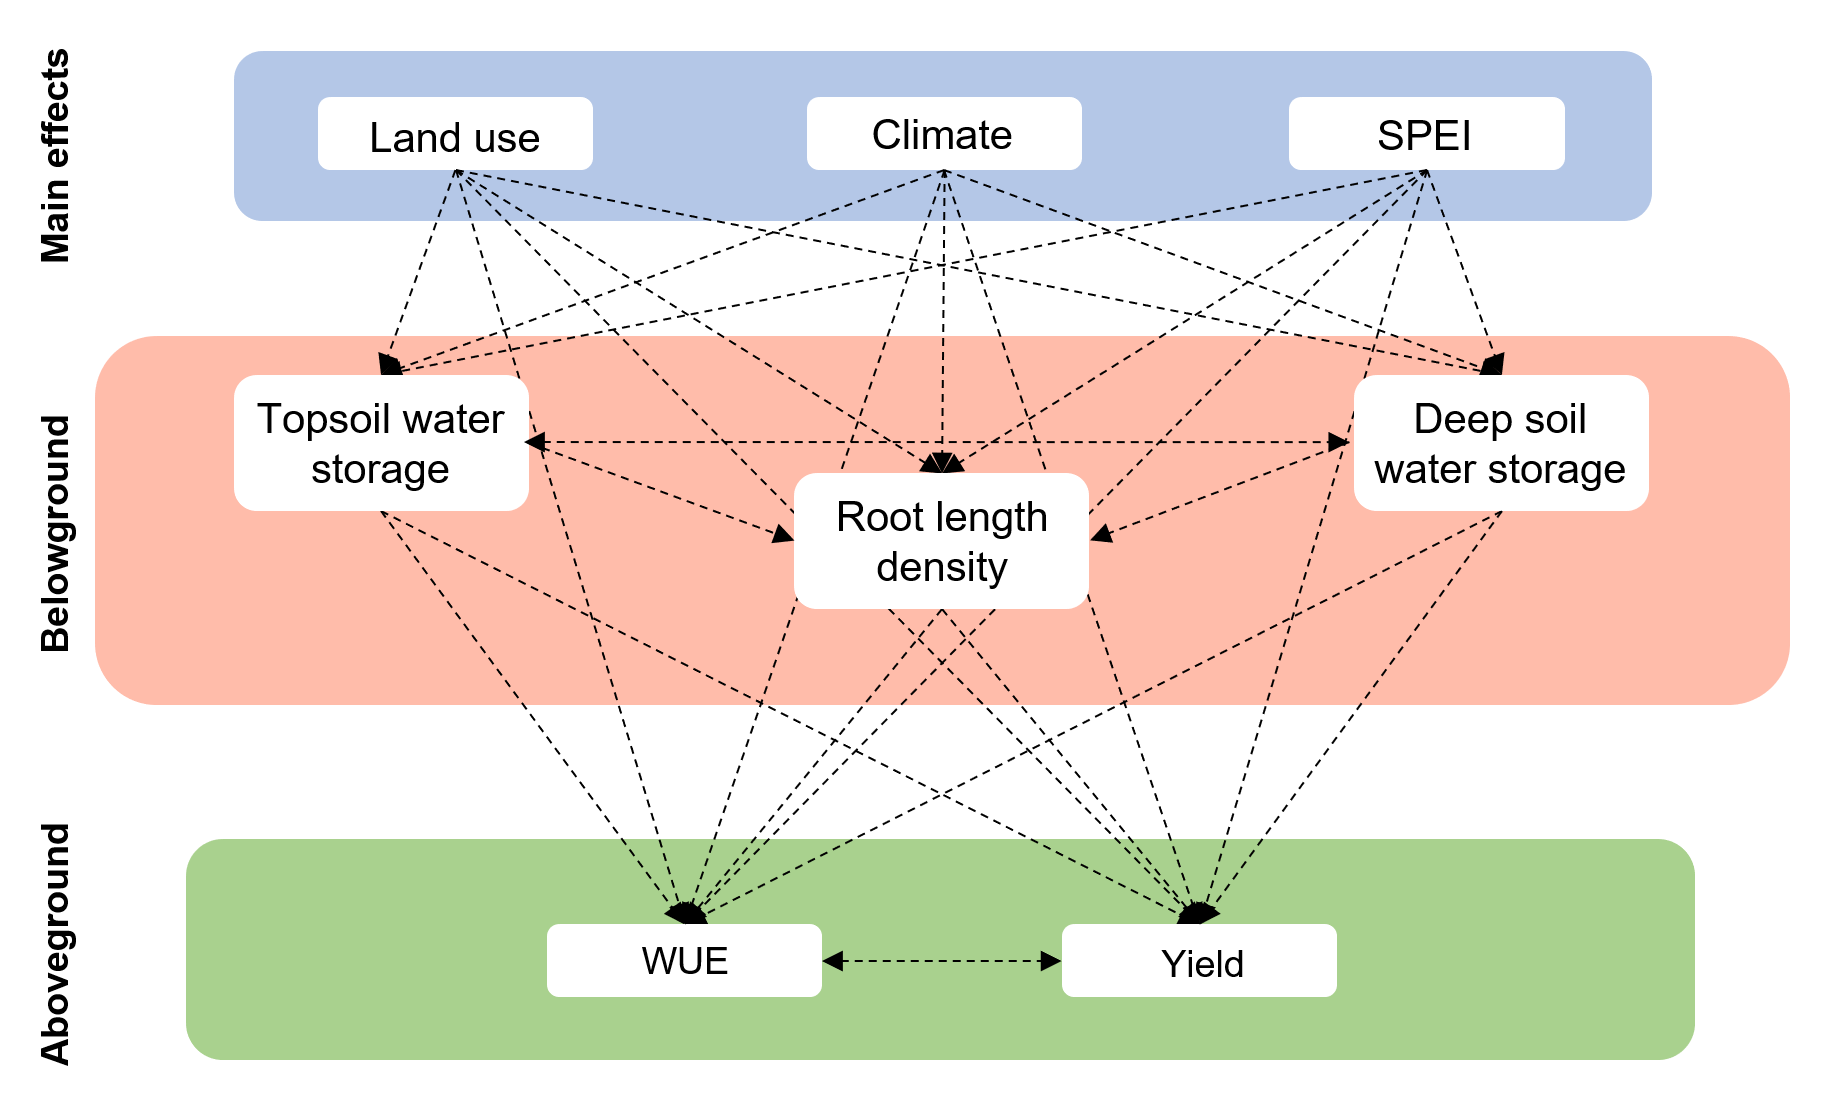


**Fig. S4** Linear regression between shallow soil water content (0-20 cm) and meteorological aridity index or water deficit. (a) Standardized precipitation-evapotranspiration index (SPEI) with a 3-month timescale. (b) meteorological water deficit.


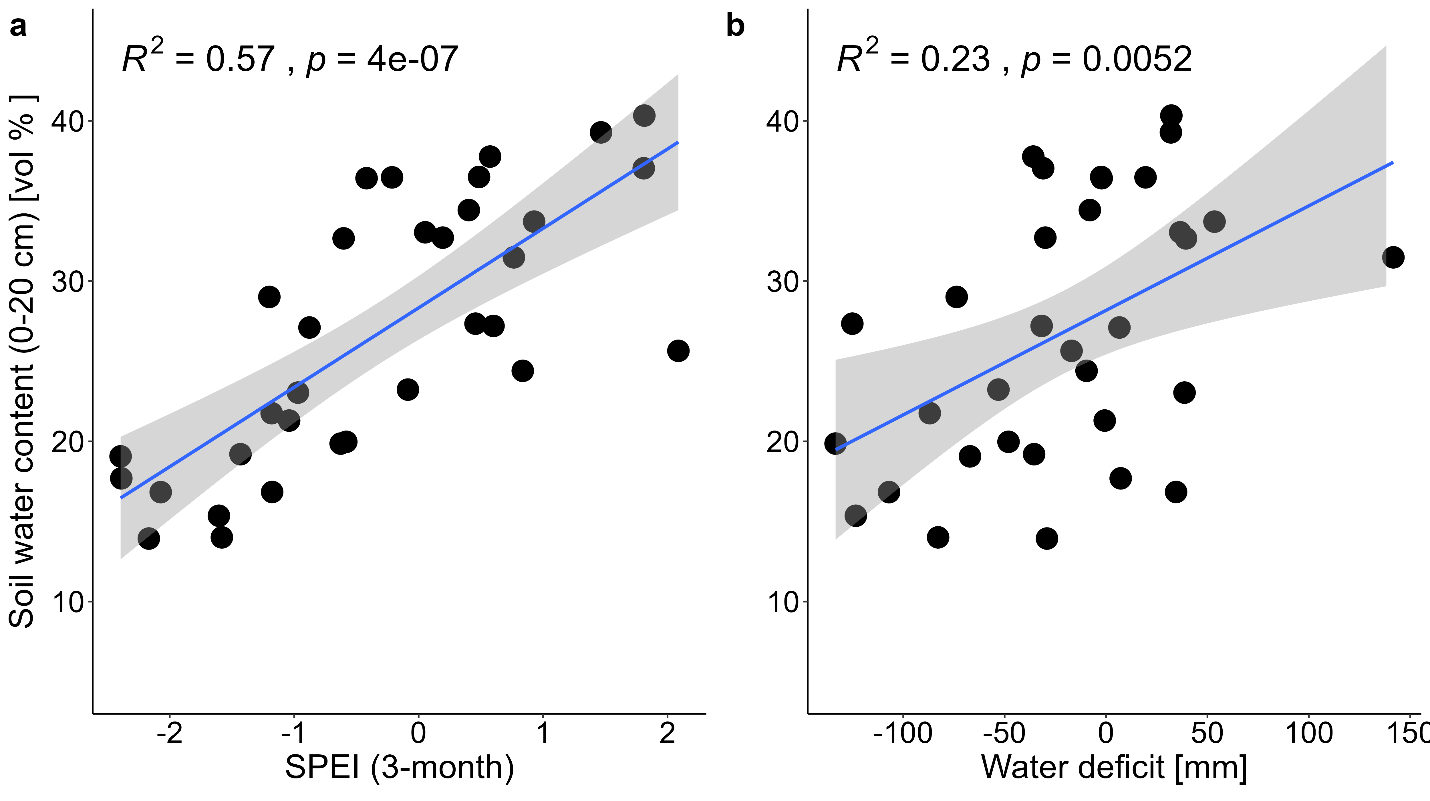


**Table S1** Overview of soil water content on different soil layers and their results of linear mixed-effects models (LMMs). Values are arithmetic mean ± standard error (n = 5). Significant *p* values (*p* < 0.05) are in bold.

|  | **Land use** | **Climate** | **0-10 cm** | **10-20 cm** | **20-30 cm** | **30-50 cm** | **50-70 cm** | **70-90 cm** | **90-110 cm** |
| --- | --- | --- | --- | --- | --- | --- | --- | --- | --- |
| **Treatment** | **Cropland** | **Ambient** | 24.34±0.81 | 25.71±0.66 | 26.6±0.6 | 23.63±0.79 | 21.07±1.14 | 21.54±1.12 | 23.05±1.24 |
| **Future** | 24.01±0.59 | 25.66±0.52 | 26.45±0.54 | 23.2±0.53 | 22.49±0.53 | 23.15±0.97 | 23.99±0.96 |
| **Grassland** | **Ambient** | 26.4±0.53 | 24.72±0.43 | 23.91±0.32 | 20.85±0.47 | 17.89±0.59 | 17.7±0.74 | 17.89±0.88 |
| **Future** | 25.99±0.66 | 24.32±0.5 | 23.79±0.38 | 20.03±0.7 | 17.64±0.75 | 18.87±0.98 | 18.18±1.03 |
| **LMMs** | **Land use** | **χ2** | 11.306 | 6.303 | 40.302 | 23.996 | 29.058 | 19.180 | 29.860 |
| ***p* value** | **<0.000** | **0.012** | **<0.001** | **<0.001** | **<0.001** | **<0.001** | **<0.001** |
| **Climate** | **χ2** | 0.411 | 0.327 | 0.097 | 1.113 | 0.325 | 2.179 | 0.315 |
| ***p* value** | 0.522 | 0.567 | 0.756 | 0.292 | 0.569 | 0.140 | 0.575 |
| **Land use * Climate** | **χ2** | 0.005 | 0.140 | 0.001 | 0.101 | 1.246 | 0.055 | 0.106 |
| ***p* value** | 0.945 | 0.709 | 0.974 | 0.751 | 0.264 | 0.814 | 0.745 |
| **Treatment** | **Conventional farming** | **Ambient** | 25.24±1.19 | 25.72±1.01 | 25.93±0.79 | 23.05±1.37 | 20.07±2.08 | 20.11±2.07 | 21.52±2.21 |
| **Future** | 23.82±1.12 | 25.24±0.99 | 25.99±0.91 | 22.44±0.4 | 22.07±0.69 | 22.59±1.6 | 23.1±1.23 |
| **Organic farming** | **Ambient** | 23.49±1.11 | 25.99±1 | 27.59±0.88 | 24.58±0.89 | 22.78±1.03 | 23.7±0.6 | 25.09±0.94 |
| **Future** | 24.32±0.57 | 26.42±0.39 | 27.38±0.62 | 24.55±0.85 | 23.66±0.81 | 24.37±1.24 | 25.4±1.49 |
| **LMMs** | **Land use** | **χ2** | 1.046 | 1.696 | 7.225 | 4.673 | 3.638 | 4.400 | 4.647 |
| ***p* value** | 0.306 | 0.193 | **0.007** | **0.031** | 0.056 | **0.036** | **0.031** |
| **Climate** | **χ2** | 0.101 | 0.001 | 0.019 | 0.145 | 1.639 | 1.515 | 0.483 |
| ***p* value** | 0.750 | 0.974 | 0.890 | 0.703 | 0.200 | 0.218 | 0.487 |
| **Land use * Climate** | **χ2** | 3.338 | 0.649 | 0.056 | 0.118 | 0.248 | 0.501 | 0.221 |
| ***p* value** | 0.068 | 0.420 | 0.813 | 0.731 | 0.618 | 0.479 | 0.639 |
| **Treatment** | **Intensive meadow** | **Ambient** | 23.22±0.59 | 22.11±0.45 | 22.10±0.52 | 20.73±0.67 | 19.59±0.58 | 21.15±0.55 | 22.26±0.65 |
| **Future** | 22.37±1.19 | 21.56±0.97 | 22.29±0.66 | 19.62±1.06 | 18.27±1.19 | 20.64±1.25 | 20.15±1.08 |
| **Extensive meadow** | **Ambient** | 25.71±0.92 | 23.90±0.81 | 22.93±0.76 | 20.08±0.46 | 17.03±0.82 | 15.77±0.86 | 15.74±0.85 |
| **Future** | 25.19±1.24 | 23.49±0.90 | 21.93±0.93 | 18.03±1.52 | 15.65±1.34 | 16.75±1.75 | 16.90±1.74 |
| **Extensive pasture** | **Ambient** | 25.37±0.96 | 23.29±0.82 | 22.08±0.38 | 18.50±1.03 | 15.10±0.68 | 15.37±0.62 | 15.64±0.93 |
| **Future** | 24.80±0.89 | 23.19±0.89 | 22.71±0.82 | 18.86±1.32 | 16.66±1.38 | 17.85±1.94 | 17.09±2.22 |
| **LMMs** | **Land use** | **χ2** | 10.619 | 6.945 | 0.159 | 4.728 | 12.388 | 20.448 | 23.817 |
| ***p* value** | **0.005** | **0.031** | 0.924 | 0.094 | **0.002** | **<0.001** | **<0.001** |
| **Climate** | **χ2** | 0.796 | 0.340 | 0.015 | 1.141 | 0.246 | 1.116 | 0.022 |
| ***p* value** | 0.372 | 0.560 | 0.904 | 0.285 | 0.620 | 0.291 | 0.881 |
| **Land use * Climate** | **χ2** | 0.041 | 0.101 | 1.792 | 2.913 | 3.222 | 1.721 | 2.942 |
| ***p* value** | 0.980 | 0.951 | 0.408 | 0.233 | 0.200 | 0.423 | 0.230 |

**Table S2** Linear mixed-effects models (LMMs) on the effects of climate, land use, year and their interactions on root, vegetation cover and functional group dependence, yield and water related properties. Significant *p* values (*p* < 0.05) are in bold.

| **Properties** | **Land use** | | | **Climate** | | **Year** | | | **Land use * Climate** | | | | **Land use * Year** | | | | **Climate * Year** | | **Land use * Climate * Year** | |
| --- | --- | --- | --- | --- | --- | --- | --- | --- | --- | --- | --- | --- | --- | --- | --- | --- | --- | --- | --- | --- |
| **χ2** | ***p* value** | | **χ2** | ***p* value** | **χ2** | ***p* value** | | **χ2** | ***p* value** | | | **χ2** | ***p* value** | | | **χ2** | ***p* value** | **χ2** | ***p* value** |
| Evapotranspiration | 94.81 | | **<0.001** | 13.89 | **<0.001** | 2604.84 | | **<0.001** | 1.66 | | 0.797 | 103.42 | | | **<0.001** | 33.97 | | **<0.001** | 8.69 | **<0.001** |
| Yield | 1096.62 | | **<0.001** | 2.54 | 0.111 | 190.69 | | **<0.001** | 11.27 | | **0.010** | 58.49 | | | **<0.001** | 1.05 | | 0.590 | 34.85 | **<0.001** |
| Water use efficiency | 695.76 | | **<0.001** | 0.13 | 0.723 | 86.71 | | **<0.001** | 6.27 | | 0.099 | 86.88 | | | **<0.001** | 4.37 | | 0.112 | 32.23 | **<0.001** |
| Topsoil water storage | 22.43 | | **0.004** | 1.59 | 0.902 | 215.45 | | **<0.001** | 1.45 | | 0.835 | 10.01 | | | **0.040** | 0.01 | | 0.979 | 4.00 | 0.407 |
| Deep soil water storage | 41.40 | | **<0.001** | 3.55 | 0.616 | 43.26 | | **<0.001** | 3.33 | | 0.504 | 5.42 | | | 0.247 | 0.08 | | 0.782 | 3.18 | 0.528 |
| Change of topsoil water storage | 36.82 | | **<0.001** | 5.10 | 0.403 | 6.86 | | **0.008** | 5.01 | | 0.286 | 29.22 | | | **<0.001** | 0.02 | | 0.881 | 7.43 | 0.115 |
| Change of deep soil water storage | 159.84 | | **<0.001** | 16.55 | **0.005** | 188.52 | | **<0.001** | 1.43 | | 0.839 | 34.38 | | | **<0.001** | 0.86 | | 0.353 | 0.35 | 0.986 |
| Root length density (0-15 cm) | 293.56 | | **<0.001** | 1.09 | 0.296 | 0.05 | | 0.816 | 2.09 | | 0.719 | 8.29 | | | 0.082 | 0.81 | | 0.367 | 0.90 | 0.924 |
| Root length density (15-30 cm) | 149.11 | | **<0.001** | 0.71 | 0.399 | 0.16 | | 0.690 | 2.51 | | 0.643 | 8.97 | | | 0.062 | 0.85 | | 0.356 | 5.09 | 0.279 |
| Root length density (30-50 cm) | 172.66 | | **<0.001** | 0.09 | 0.761 | 16.81 | | **<0.001** | 4.56 | | 0.336 | 11.07 | | | **0.026** | 0.03 | | 0.854 | 4.18 | 0.383 |
| Root length density (0-50 cm) | 100.04 | | **<0.001** | 0.13 | 0.718 | 0.13 | | 0.721 | 0.14 | | 0.998 | 2.59 | | | 0.629 | 0.04 | | 0.848 | 0.40 | 0.982 |
| Corrected root length density | 223.42 | | **<0.001** | 0.39 | 0.533 | 2.13 | | 0.144 | 0.45 | | 0.979 | 20.64 | | | **<0.001** | 0.13 | | 0.724 | 1.33 | 0.857 |
| Root length in < 0.1 mm diameter | 267.87 | | **<0.001** | 0.61 | 0.434 | 0.18 | | 0.672 | 1.14 | | 0.889 | 9.90 | | | **0.042** | 0.38 | | 0.537 | 0.52 | 0.972 |
| Root length in 0.1-0.2 mm diameter | 311.08 | | **<0.001** | 0.15 | 0.701 | 1.53 | | 0.216 | 0.27 | | 0.992 | 6.61 | | | 0.158 | 0.03 | | 0.870 | 2.11 | 0.716 |
| Root length in 0.2-0.3 mm diameter | 485.12 | | **<0.001** | 0.00 | 0.976 | 3.48 | | 0.062 | 1.25 | | 0.869 | 12.14 | | | **0.016** | 0.26 | | 0.613 | 5.34 | 0.254 |
| Root length in 0.3-0.4 mm diameter | 366.45 | | **<0.001** | 0.12 | 0.735 | 9.19 | | **0.002** | 1.50 | | 0.827 | 22.21 | | | **<0.001** | 0.00 | | 0.984 | 3.25 | 0.517 |
| Root length in 0.4-0.5 mm diameter | 280.98 | | **<0.001** | 0.76 | 0.382 | 12.25 | | **<0.001** | 4.29 | | 0.368 | 13.57 | | | **0.009** | 0.32 | | 0.573 | 2.68 | 0.614 |
| Root length in > 0.5 mm diameter | 198.36 | | **<0.001** | 4.93 | **0.026** | 12.89 | | **<0.001** | 3.51 | | 0.476 | 7.72 | | | 0.102 | 0.98 | | 0.322 | 1.79 | 0.773 |
| Net change in water content | 65.20 | | **<0.001** | 0.00 | 0.997 | 1106.39 | | **<0.001** | 7.63 | | 0.105 | 19.60 | | | **<0.001** | 5.89 | | **0.015** | 5.82 | 0.213 |
| Total vegetation cover | 1.78 | | 0.411 | 0.07 | 0.792 | 12.85 | | **<0.001** | 3.62 | | 0.164 | 1.92 | | | 0.382 | 2.30 | | 0.129 | 2.06 | 0.357 |
| Functional group dependence | 618.05 | | **<0.001** | 1.17 | 0.279 | 22.22 | | **<0.001** | 7.84 | | **0.020** | 3.99 | | | 0.136 | 0.24 | | 0.625 | 0.11 | 0.947 |

**Table S3** Overview of root, yield and water related properties. Values are arithmetic mean ± standard error (n = 5). CF, OF, IM, EM and EP represent conventional farming, organic farming, intensive meadow, extensive meadow and extensive pasture, respectively. RA of grass: relative abundance of grass, RA of forb: relative abundance of forb, RA of grass: relative abundance of forb, RLD 0-15 cm: root length density on 0-15 cm depth, RLD 15-30 cm: root length density on 15-30 cm depth, RLD 30-50 cm: root length density on 30-50 cm depth, RLD 0-50 cm: root length density on 0-50 cm depth, RLD corrected: corrected root length density, *P* + ΔS: net change in water content during peak growth.

| **Year** | **Climate** | **Land-use** | **Total vegetation cover [%]** | **RA of grass**  **[%]** | **RA of forb**  **[%]** | **RA of legume**  **[%]** | **RLD 0-15 cm**  **[cm cm-3]** | **RLD 15-30 cm**  **[cm cm-3]** | **RLD 30-50 cm**  **[cm cm-3]** | **RLD 0-50 cm**  **[cm cm-3]** | **RLD corrected**  **[cm cm-3]** | ***P* + ΔS**  **[mm]** |
| --- | --- | --- | --- | --- | --- | --- | --- | --- | --- | --- | --- | --- |
| **2022** | **Ambient** | **CF** | - | - | - | - | 4.38±0.37 | 3.60±0.77 | 2.05±0.33 | 3.22±0.23 | 2.90±0.21 | -75.81±0.83 |
| **OF** | - | - | - | - | 2.78±0.22 | 1.78±0.42 | 0.93±0.19 | 1.74±0.12 | 1.48±0.10 | -61.98±3.09 |
| **IM** | 68.6±3.71 | 96.7±2.0 | 3.3±2.0 | - | 32.01±7.99 | 10.63±2.37 | 3.66±0.53 | 14.25±3.16 | 8.47±1.88 | -59.67±1.49 |
| **EM** | 71.1±2.16 | 45.0±6.5 | 35.7±6.1 | 19.3±5.5 | 36.47±4.55 | 11.97±2.24 | 3.42±0.63 | 15.90±1.96 | 8.54±1.05 | -63.68±3.19 |
| **EP** | 76.0±4.52 | 63.3±6.3 | 31.1±6 | 5.6±1.4 | 32.92±4.78 | 12.13±0.74 | 3.16±0.47 | 14.78±1.51 | 7.45±0.76 | -60.16±1.35 |
| **Future** | **CF** | - | - | - | - | 4.83±0.33 | 2.42±0.18 | 1.60±0.27 | 2.81±0.16 | 2.54±0.14 | -70.64±1.57 |
| **OF** | - | - | - | - | 3.20±0.31 | 1.66±0.13 | 1.25±0.08 | 1.96±0.14 | 1.67±0.12 | -62.19±1.09 |
| **IM** | 81.9±2.35 | 99.2±0.6 | 0.8±0.6 | - | 30.00±2.92 | 12.99±4.23 | 3.81±0.82 | 14.42±2.08 | 8.57±1.23 | -61.60±1.80 |
| **EM** | 71.3±2.27 | 44.9±4.2 | 40.3±3.6 | 14.8±3.7 | 34.65±4.86 | 11.07±2.93 | 2.91±0.27 | 14.88±2.15 | 7.99±1.15 | -72.97±2.81 |
| **EP** | 74.3±3.06 | 76.2±4.3 | 18.1±3.7 | 5.7±2.2 | 31.66±2.89 | 13.14±3.53 | 3.55±0.56 | 14.86±1.68 | 7.49±0.85 | -68.63±1.84 |
| **2023** | **Ambient** | **CF** | - | - | - | - | 7.64±1.11 | 3.31±0.48 | 2.77±0.37 | 4.39±0.13 | 3.80±0.11 | -113.06±4.05 |
| **OF** | - | - | - | - | 7.99±0.79 | 3.13±0.29 | 1.78±0.06 | 4.05±0.29 | 3.69±0.26 | -112.20±3.44 |
| **IM** | 84.8±4.53 | 97.2±0.6 | 2.7±0.6 | - | 25.69±2.29 | 9.64±0.81 | 3.79±0.39 | 12.11±0.8 | 6.47±0.43 | -95.36±4.81 |
| **EM** | 83.8±3.20 | 39.0±5.2 | 25.2±3.5 | 35.8±5.1 | 36.97±5.33 | 11.95±1.59 | 4.56±0.23 | 16.50±1.80 | 9.24±1.01 | -112.42±1.65 |
| **EP** | 83.4±5.19 | 49.0±6.4 | 30.3±7.1 | 20.6±4.5 | 38.89±8.47 | 10.14±2.33 | 3.87±0.66 | 16.26±3.10 | 8.73±1.67 | -105.13±2.34 |
| **Future** | **CF** | - | - | - | - | 8.00±0.36 | 2.98±0.48 | 1.89±0.30 | 4.05±0.18 | 3.50±0.16 | -108.19±5.34 |
| **OF** | - | - | - | - | 7.92±1.14 | 3.84±0.64 | 1.17±0.23 | 4.00±0.45 | 3.64±0.41 | -110.62±2.69 |
| **IM** | 80.9±4.63 | 97.1±0.8 | 2.8±0.7 | - | 21.17±4.61 | 8.97±1.21 | 3.85±0.40 | 10.58±1.78 | 5.65±0.95 | -92.05±2.07 |
| **EM** | 80.1±4.65 | 34.9±5.3 | 29.1±5.4 | 35.9±3.9 | 32.72±5.34 | 18.41±3.41 | 5.18±0.53 | 17.41±2.68 | 9.75±1.50 | -105.03±5.21 |
| **EP** | 77.7±3.91 | 61.5±7.0 | 17.4±4.8 | 20.9±5.8 | 29.45±4.78 | 12.00±1.89 | 4.28±0.42 | 14.15±1.31 | 7.60±0.71 | -107.50±3.89 |

**Table S4** Overview of yield and water related properties. Values are arithmetic mean ± standard error (n = 5). CF, OF, IM, EM and EP represent conventional farming, organic farming, intensive meadow, extensive meadow and extensive pasture, respectively. ET: evapotranspiration, WUE: water use efficiency, Δ water 0-30 cm: change of topsoil water storage, Δ water 30-110 cm: change of deep soil water storage.

| **Climate** | **Land use** | **Year** | **ET** | **Yield** | **WUE** | **Topsoil storage [mm/mm]** | **Deep soil storage [mm/mm]** | **Δ water 0-30 cm [mm]** | **Δ water 30-110 cm [mm]** |
| --- | --- | --- | --- | --- | --- | --- | --- | --- | --- |
| **[mm]** | **[kg ha-1]** | **[kg m-1]** |
| **Ambient** | **CF** | **2022** | 161.82±3.96 | 9.33±0.42 | 5.78±0.29 | 0.184±0.002 | 0.200±0.010 | -8.71±0.19 | -13.41±0.89 |
| **2023** | 198.22±4.74 | 13.07±0.43 | 6.60±0.21 | 0.201±0.013 | 0.182±0.026 | -16.28±0.62 | -12.06±0.74 |
| **2024** | 264.21±12.33 | 11.89±1.06 | 4.48±0.30 | 0.293±0.014 | 0.287±0.009 | 2.47±0.69 | -2.89±2.17 |
| **OF** | **2022** | 128.26±4.86 | 6.10±0.22 | 4.78±0.24 | 0.212±0.008 | 0.243±0.014 | -6.59±0.98 | -7.12±0.69 |
| **2023** | 198.77±4.53 | 4.91±0.37 | 2.48±0.22 | 0.202±0.009 | 0.241±0.008 | -18.88±0.89 | -4.72±0.71 |
| **2024** | 266.94±3.60 | 9.36±0.45 | 3.51±0.19 | 0.285±0.015 | 0.275±0.007 | 2.97±0.68 | -5.19±1.22 |
| **IM** | **2022** | 123.63±5.19 | 5.98±0.18 | 4.85±0.11 | 0.168±0.007 | 0.227±0.012 | -4.70±0.53 | -5.87±0.60 |
| **2023** | 158.97±5.58 | 7.24±0.17 | 4.58±0.19 | 0.200±0.004 | 0.200±0.009 | -13.62±0.97 | -0.24±0.68 |
| **2024** | 265.18±2.72 | 8.29±0.30 | 3.13±0.11 | 0.285±0.005 | 0.292±0.005 | 0.86±0.45 | 0.64±0.80 |
| **EM** | **2022** | 126.46±2.17 | 3.17±0.31 | 2.51±0.27 | 0.187±0.009 | 0.199±0.012 | -5.39±0.62 | -7.57±0.47 |
| **2023** | 175.64±5.58 | 4.07±0.42 | 2.33±0.27 | 0.220±0.006 | 0.167±0.007 | -15.48±0.43 | -6.86±1.56 |
| **2024** | 262.88±2.55 | 4.98±0.26 | 1.89±0.09 | 0.299±0.008 | 0.271±0.005 | 1.66±0.62 | 0.06±1.35 |
| **EP** | **2022** | 134.22±4.65 | - | - | 0.185±0.009 | 0.174±0.015 | -4.78±0.41 | -8.55±0.93 |
| **2023** | 172.88±8.55 | - | - | 0.216±0.006 | 0.160±0.011 | -14.56±0.51 | -4.49±0.85 |
| **2024** | 265.26±3.40 | - | - | 0.289±0.006 | 0.275±0.004 | 0.27±0.66 | 0.40±0.59 |
| **Future** | **CF** | **2022** | 158.39±9.62 | 8.73±0.20 | 5.58±0.31 | 0.165±0.017 | 0.200±0.012 | -7.08±0.40 | -11.37±0.56 |
| **2023** | 215.96±14.00 | 11.30±0.39 | 5.34±0.45 | 0.205±0.011 | 0.215±0.015 | -15.41±0.71 | -10.94±2.46 |
| **2024** | 236.02±6.79 | 13.13±0.71 | 5.57±0.29 | 0.284±0.011 | 0.285±0.005 | 0.45±1.07 | -1.31±1.33 |
| **OF** | **2022** | 120.56±3.00 | 5.17±0.39 | 4.30±0.35 | 0.198±0.007 | 0.231±0.017 | -8.15±0.60 | -4.82±0.57 |
| **2023** | 205.17±5.84 | 5.39±0.42 | 2.65±0.27 | 0.210±0.004 | 0.249±0.010 | -18.44±0.78 | -4.98±0.86 |
| **2024** | 243.22±5.08 | 6.74±0.66 | 2.79±0.30 | 0.290±0.005 | 0.285±0.005 | 0.01±0.65 | -3.13±1.34 |
| **IM** | **2022** | 116.69±3.79 | 5.36±0.13 | 4.62±0.21 | 0.162±0.013 | 0.207±0.019 | -4.51±0.42 | -4.49±0.35 |
| **2023** | 153.82±5.72 | 7.43±0.3.1 | 4.84±0.19 | 0.204±0.008 | 0.200±0.013 | -13.48±0.25 | 1.53±0.89 |
| **2024** | 247.51±2.65 | 8.55±0.35 | 3.45±0.14 | 0.277±0.005 | 0.280±0.007 | -0.12±0.30 | 0.72±0.39 |
| **EM** | **2022** | 135.53±0.81 | 3.44±0.41 | 2.54±0.31 | 0.197±0.011 | 0.206±0.023 | -7.79±0.50 | -7.48±0.36 |
| **2023** | 174.34±3.75 | 4.85±0.10 | 2.78±0.03 | 0.216±0.007 | 0.174±0.018 | -15.35±1.16 | -2.78±0.88 |
| **2024** | 243.56±6.21 | 5.10±0.29 | 2.09±0.10 | 0.285±0.011 | 0.264±0.014 | 0.28±1.21 | -0.68±1.06 |
| **EP** | **2022** | 126.26±6.33 | - | - | 0.195±0.014 | 0.207±0.027 | -5.74±0.71 | -5.47±0.58 |
| **2023** | 176.62±4.46 | - | - | 0.214±0.005 | 0.187±0.018 | -16.36±0.71 | -1.60±0.82 |
| **2024** | 241.43±4.73 | - | - | 0.292±0.007 | 0.264±0.014 | 0.36±0.87 | 1.52±0.34 |

**Fig. S5** Relative proportion of root length ranges (≤ 0.2 mm and > 0.2 mm) across five land-use types and two years. CF, OF, IM, EM and EP represent conventional farming, organic farming, intensive meadow, extensive meadow and extensive pasture, respectively.


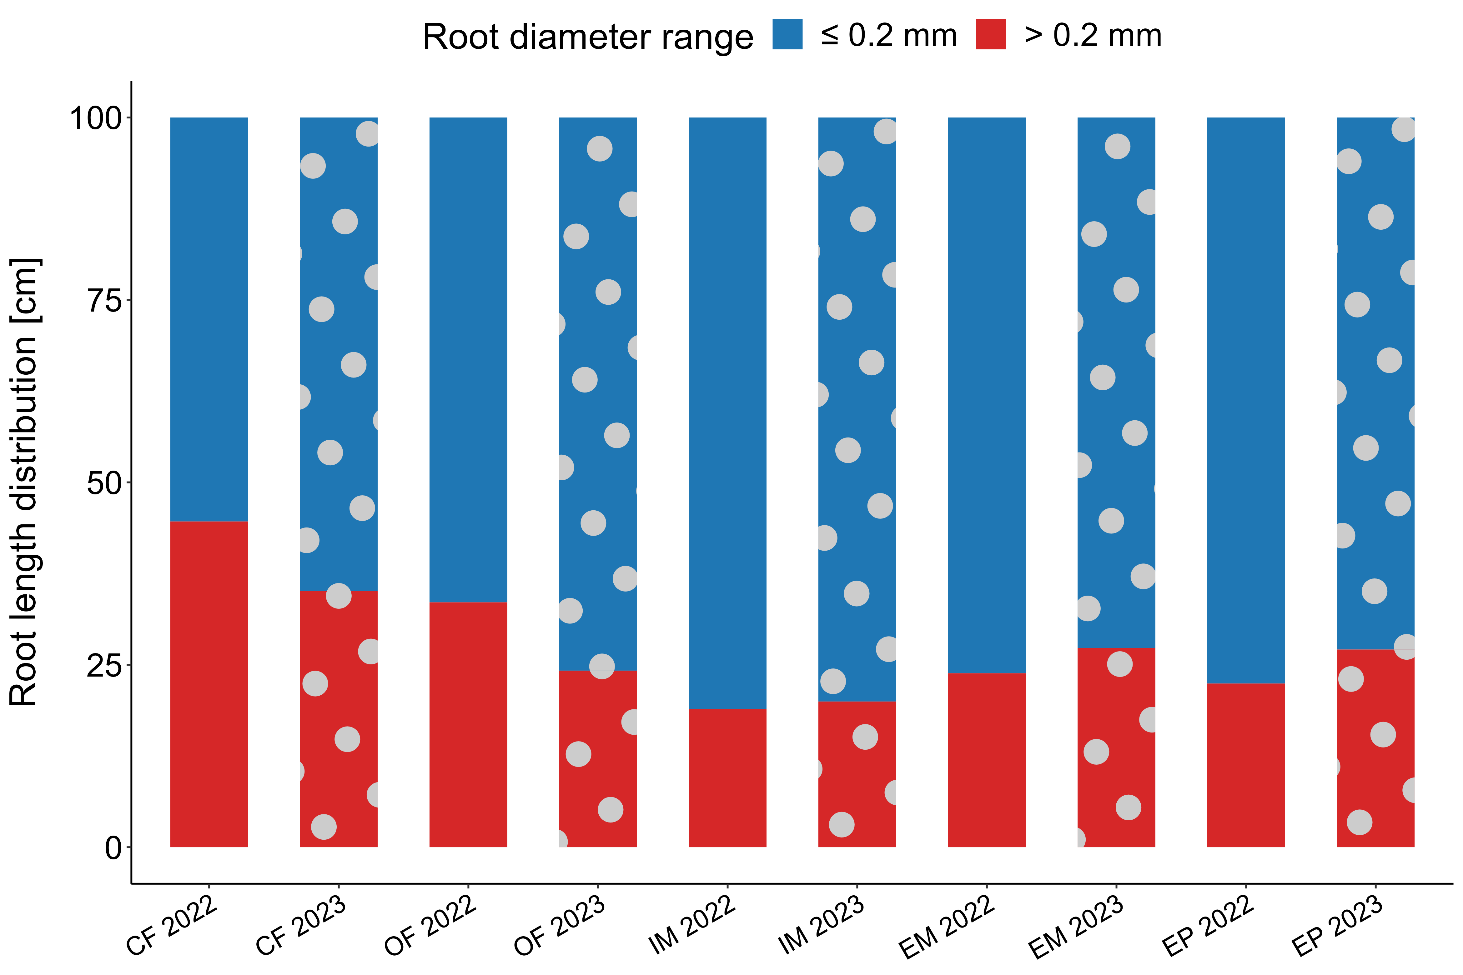


**Fig. S6** Summed cover per plant functional groups (grass, forb, and legume) across three grassland types and two years. IM, EM and EP represent intensive meadow, extensive meadow and extensive pasture, respectively.


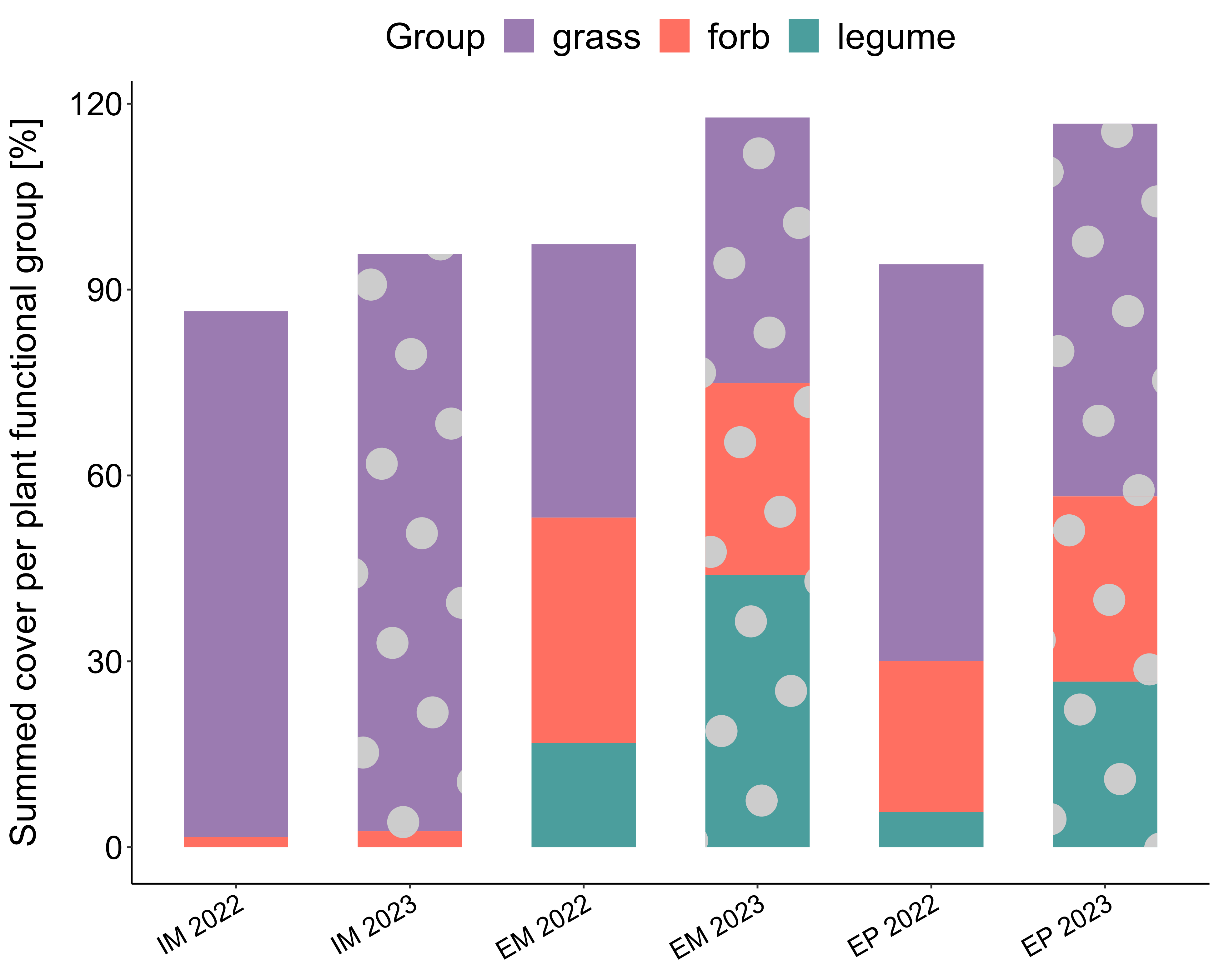


**Fig. S7** Changes in soil water storage during growing season under different land-use types and future climate scenario across three years. (a) change of topsoil (0-30 cm) water storage, (b) change of deep soil (30-110 cm) water storage. Box plots represent the 0, 25, 50, 75, and 100 percentiles, and cross symbols represent the arithmetic mean (n = 10). Growing season refers to the period from when daily mean temperatures consistently exceed 5 °C until crop harvest. Box plots represent the 0, 25, 50, 75, and 100 percentile and cross symbols the arithmetic mean (n = 10). Significant differences between land use, climate, year, interaction of land use and year, land use, climate and year are indicated ** (*p* < 0.01) and *** (*p* < 0.001). CF, OF, IM and EM represent conventional farming, organic farming, intensive meadow, and extensive meadow, respectively.


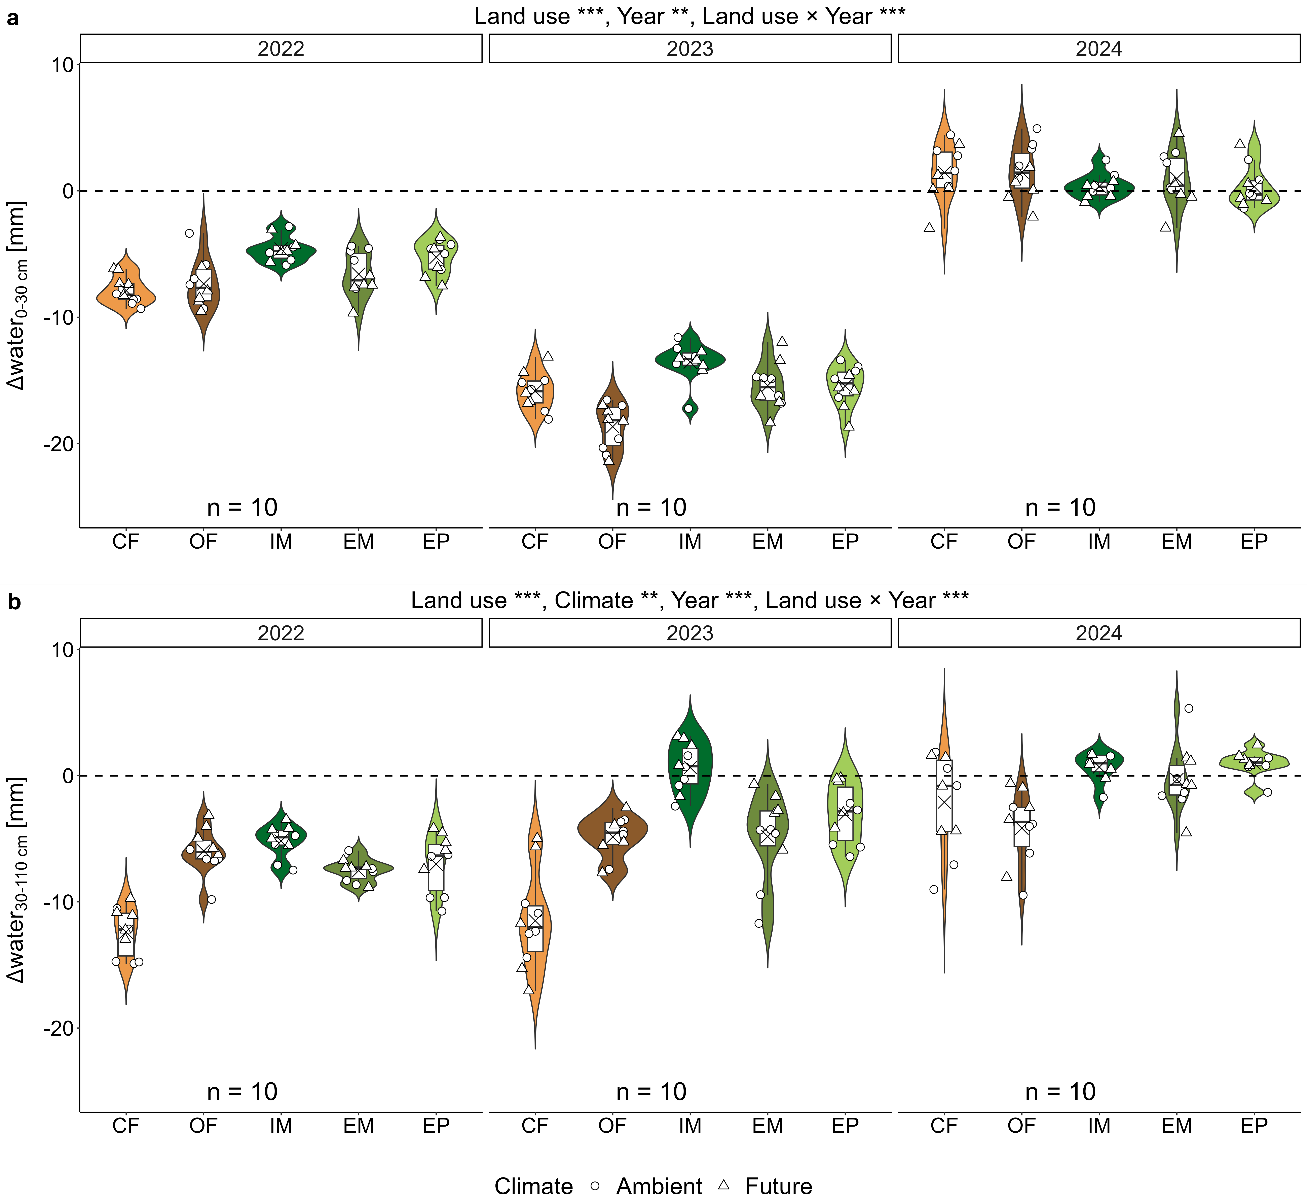


**Fig. S8** Effect of land use, future climate scenario on annual yield across three years. CF, OF, IM and EM represent conventional farming, organic farming, intensive meadow, and extensive meadow respectively.


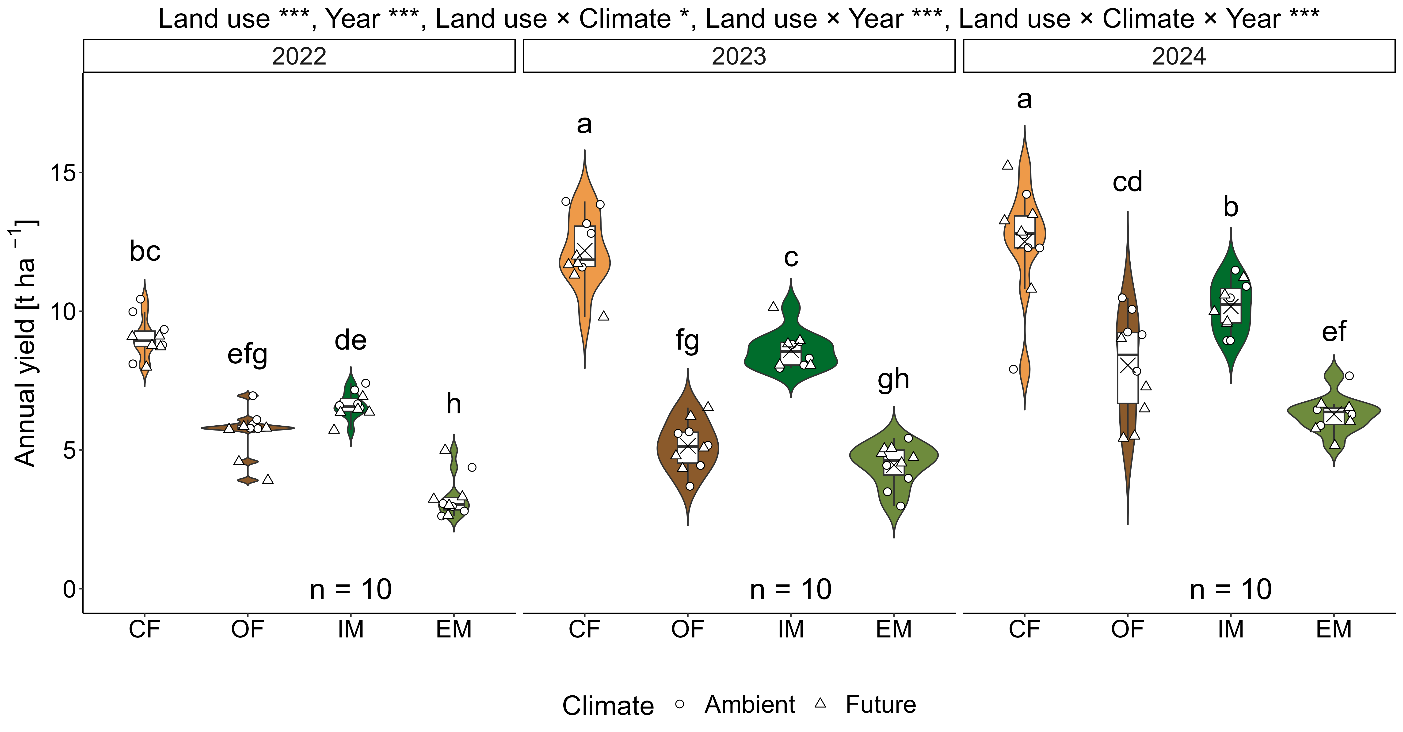

Supplement: Supplementary file 1 [file cdccc2802390fee1fff81f17.docx]
